# Supplementary material
Source: publisher figshare collection journal article supplement (https://sage.figshare.com/ndownloader/files/22964210)

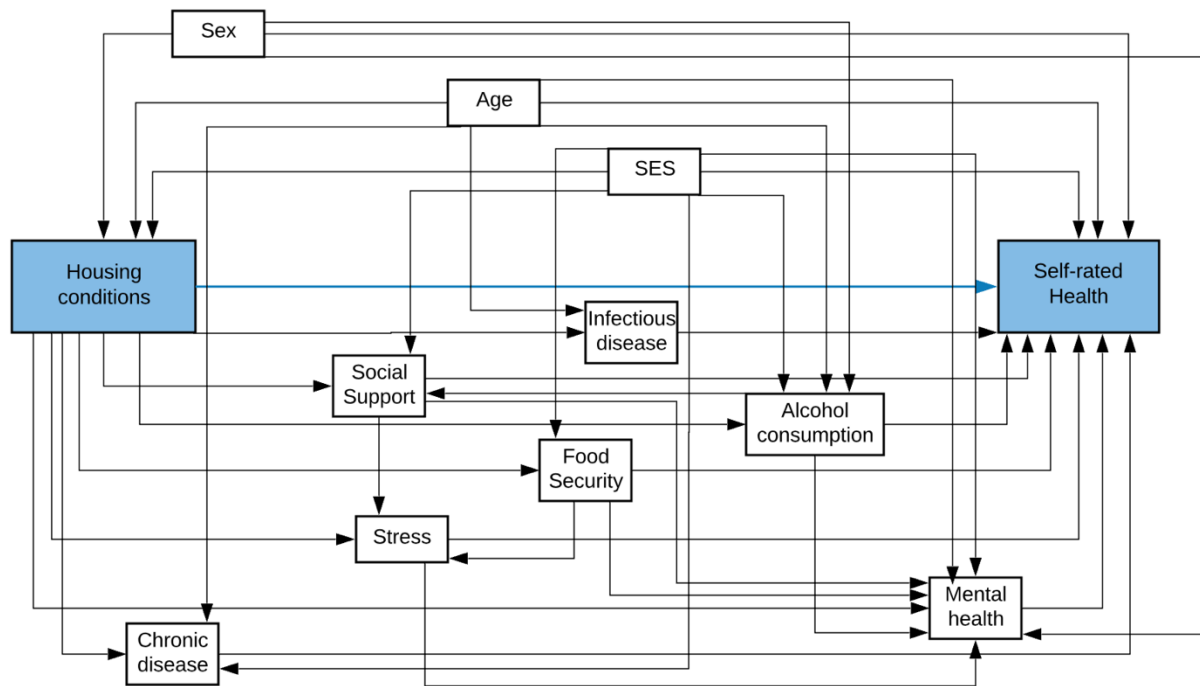

Figure 2 - DAG of the causal pathway between housing conditions and SRH

Supplement: Supplementary file 1 [file 22964210]
